# Supplementary material for: A direct microcontact printing induced supramolecular interaction for creating shape-tunable patterned polymeric surfaces
Source: Royal Society of Chemistry journal article supplement (doi:10.1039/c5tc01576f), 2015-01-01
Supplement: c5tc01576f1.pdf [file c5tc01576f1.pdf]

## Electronic Supplementary Information for

### Direct Microcontact Printing Induced Supramolecular Interaction for Creating Shape-tunable Patterned Polymer Surfaces

Meiwen Peng,<sup>a,b,†</sup> Peng Xiao,<sup>b,†</sup> Youju Huang,<sup>\*b</sup> Mujin Cai,<sup>a</sup> Yanshan Hou,<sup>b</sup> Jiaming Chen,<sup>b</sup> Zhenzhong Liu,<sup>b</sup> Zhidong Xiao,<sup>\*a</sup> and Tao Chen<sup>\*b</sup>

<sup>a</sup>Department of Chemistry, State Key Laboratory of Agricultural Microbiology, Huazhong Agricultural University, 1 Shizishan Street, Wuhan 430070, China.

E-mail: [zdxiao@mail.hzau.edu.cn](mailto:zdxiao@mail.hzau.edu.cn)

<sup>b</sup>Division of Polymer and Composite Materials, Ningbo Institute of Material Technology and Engineering, Chinese Academy of Science, 1219 Zhongguan West Road, Ningbo 315201, China.

E-mail: [tao.chen@nimte.ac.cn](mailto:tao.chen@nimte.ac.cn) E-mail: [yjhuang@nimte.ac.cn](mailto:yjhuang@nimte.ac.cn)

<sup>†</sup>These authors contribute equally to this work.

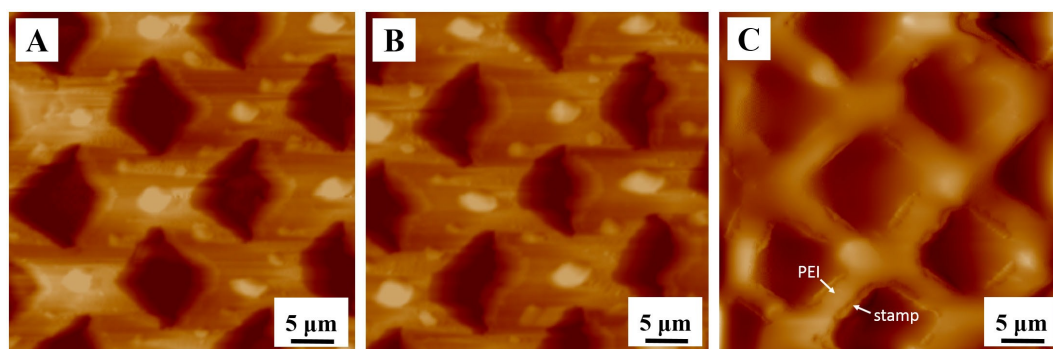

Figure S1. Tapping mode AFM images ( $40\ \mu\text{m} \times 40\ \mu\text{m}$ ) of stamp before microcontact printing with ink Mw of 600 (A), 1800 (B) and 10000 (C), respectively. The ink concentration is 10 mg/mL.

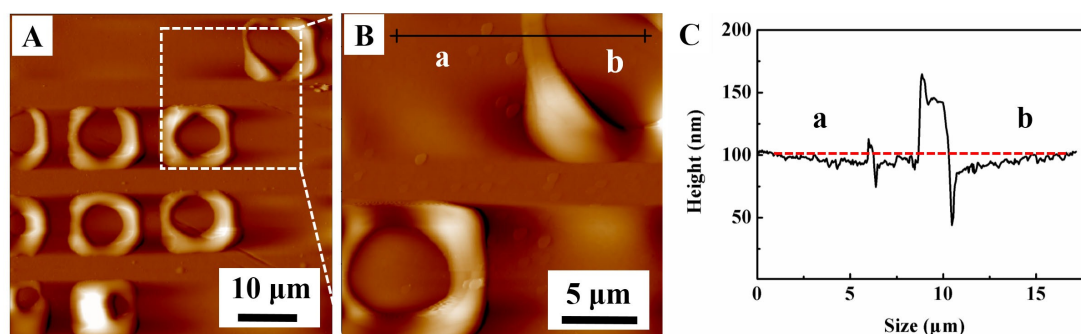

Figure S2. Tapping mode AFM images (A, B) and corresponding cross-sectional profile (C) show there are no polymer films in the center of rings. The height of naked

silicon wafer (a) is consistent with center area of rings (b).
